# Supplementary material for: Hydrogenated monolayer graphene with reversible and tunable wide band gap and its field-effect transistor
Source: PubMed Central journal article supplement (PMC5109464; doi:10.1038/ncomms13261), 2016-11-10
Supplement: ncomms13261-s1.pdf [file ncomms13261-s1.pdf]

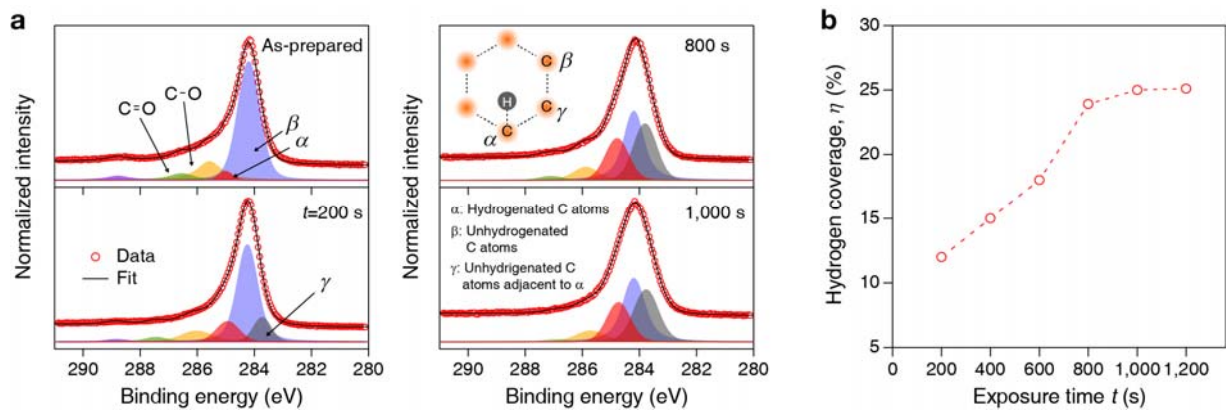

**Supplementary Figure 1 | Chemical states of pristine graphene and H-Gr. a**, C 1s core-level spectra of pristine graphene and H-Gr. The  $sp^3$ ,  $sp^2$  and H–C–C bonds are denoted as  $\alpha$ ,  $\beta$  and  $\gamma$ , respectively. **b**, Changes in the hydrogen coverage  $\eta$  with the plasma exposure time  $t$ .

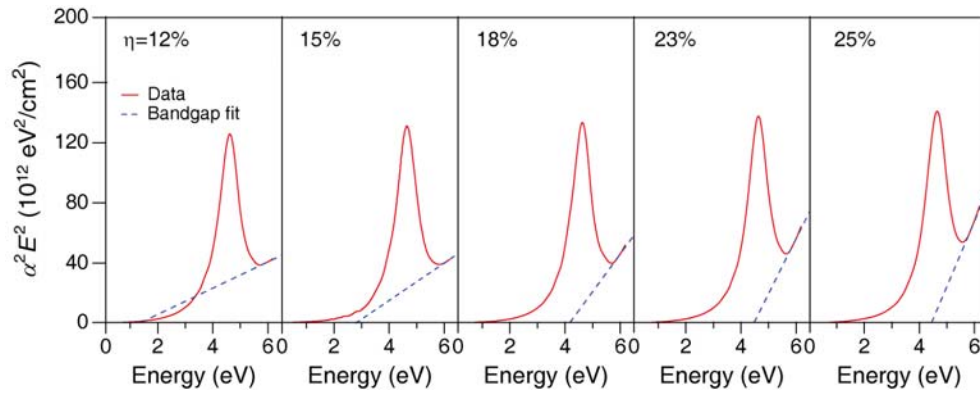

**Supplementary Figure 2 | Estimation of an optical bandwidth in H-Gr with various hydrogen coverage ( $\eta$ ) at 300 K. As  $\eta$  increased, the band gap increased and then saturated at  $\sim 4.5$  eV.**

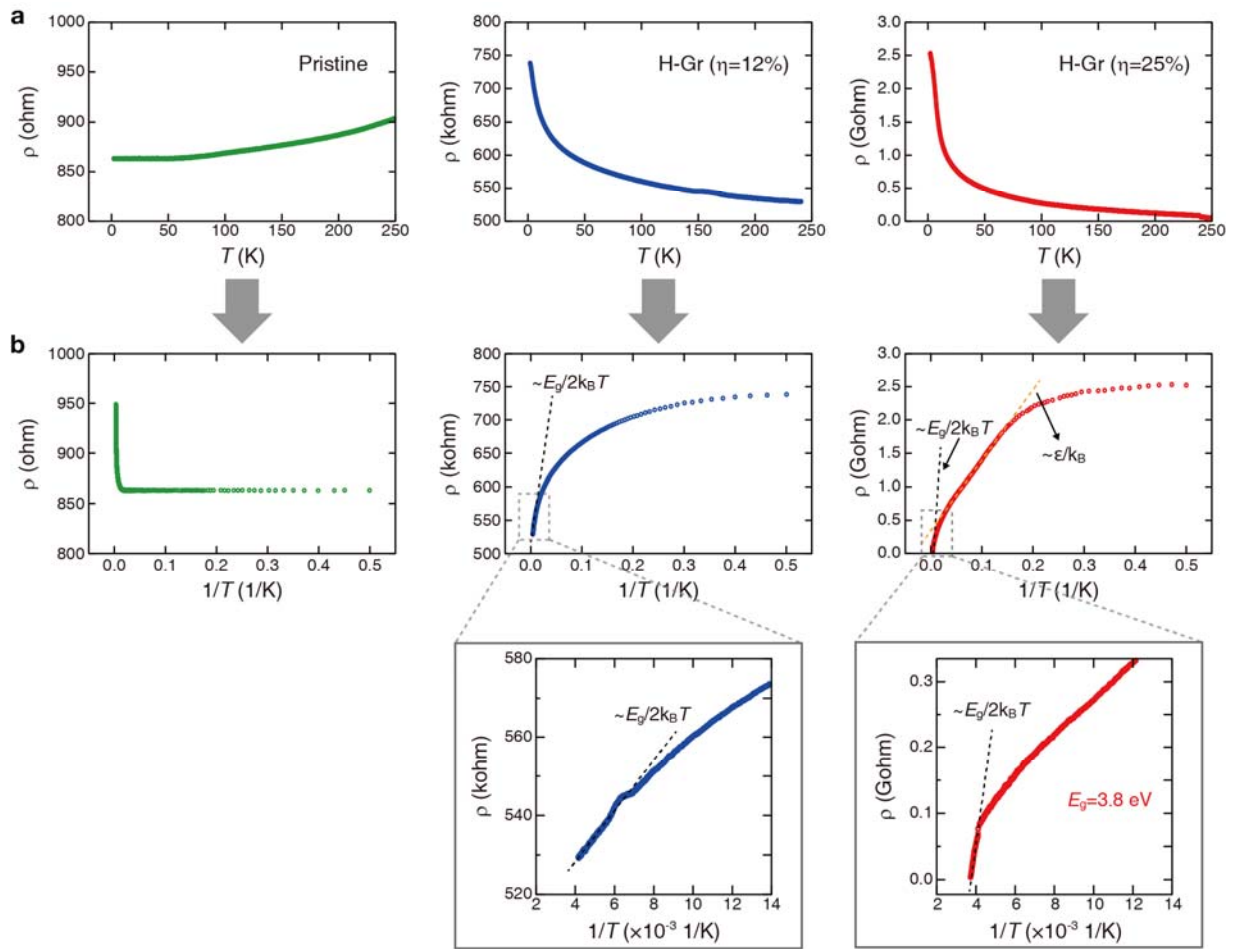

**Supplementary Figure 3 | Temperature dependence of resistivity as evidence of a bandgap in saturated H-Gr. a,  $\rho$ - $T$  curves of pristine, H-Gr ( $\eta=12\%$ ), and H-Gr ( $\eta=25\%$ ). b,  $\rho$ - $T^{-1}$  curves of pristine, H-Gr ( $\eta=12\%$ ), and H-Gr ( $\eta=25\%$ ).**

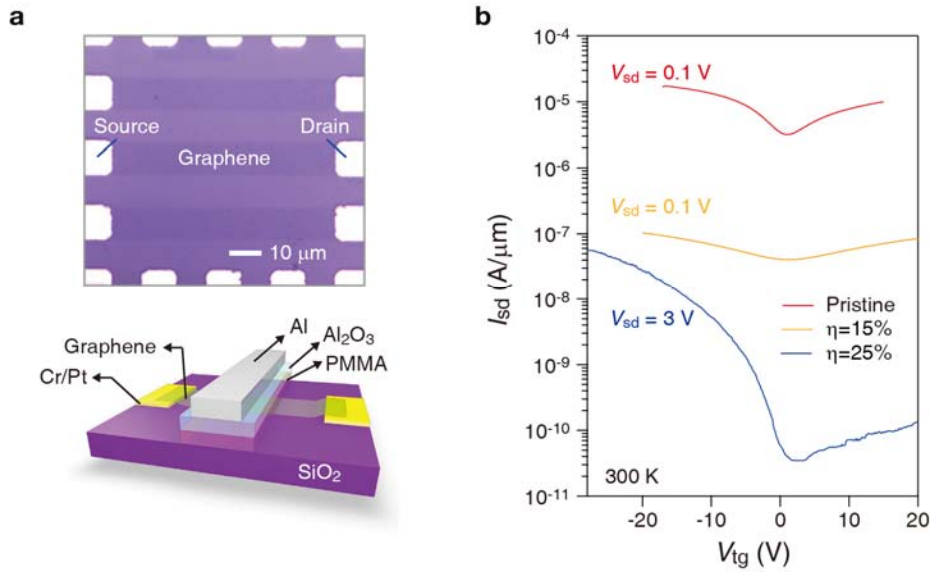

**Supplementary Figure 4 | The characteristics of the top-gated field effect transistor (FET) made from H-Gr.** **a**, The optical image and the schematic illustration of the FET; The 60 nm-thick Al-oxide layer and the 50 nm-thick Al electrode were deposited on the 50 nm-thick PMMA layer without breaking vacuum by sputtering. The PMMA/Al-oxide double layer formed a gate dielectric and its capacitance was estimated to be  $2.1 \times 10^{-8} \text{ Fcm}^{-2}$ . **b**, The  $I$ - $V$  source-drain characteristics as a function of gate bias of the FETs made from pristine and hydrogenated graphene.

**Supplementary Table 1 | The electrical properties of pristine graphene and band-gapped H-Gr**

|                                                  |                                               | <b>Pristine<br/>graphene</b> | <b>H-Gr<br/>(<math>\eta=12\%</math>)</b> | <b>H-Gr<br/>(<math>\eta=25\%</math>)</b> |
|--------------------------------------------------|-----------------------------------------------|------------------------------|------------------------------------------|------------------------------------------|
|                                                  | $R_s$ ( $\Omega/\square$ )                    | 631.3                        | $107.8 \times 10^3$                      | $423.1 \times 10^6$                      |
| FET<br>measurements                              | $\mu$ ( $\text{cm}^2/\text{V}\cdot\text{s}$ ) | 2,555.6                      | 100.7                                    | 2.8                                      |
| Hall<br>measurements<br>(at $V_{\text{bg}}=0$ V) | $\mu$ ( $\text{cm}^2/\text{V}\cdot\text{s}$ ) | 5,229.4                      | 273.6                                    | 3.7                                      |
|                                                  | Carrier concentration<br>( $\text{cm}^{-2}$ ) | $6.8 \times 10^{12}$         | $4.5 \times 10^{12}$                     | $3.8 \times 10^{11}$                     |

## Supplementary Note 1

### Estimation of hydrogen coverage by XPS.

We found that in the case of a band gap of 3.9 eV, about 25% was the hydrogen coverage  $\eta$  as calculated by quantitative analyses of the C 1s core-level measured by synchrotron radiation X-ray photoelectron spectroscopy (XPS), which corresponds to stoichiometric  $C_4H^{1,2}$ . In the calculation, we assumed that hydrogen atoms are chemically bonded to carbon atoms on the top surface only since the surface of graphene on a  $SiO_2/Si$  substrate is indirectly exposed to the plasma. The C 1s spectrum contains various bonding types, such as  $sp^3$ ,  $sp^2$  and H–C–C, of hydrogenated graphene, which we call  $\alpha$ ,  $\beta$  and  $\gamma$ , respectively. The CVD graphene is mainly composed of  $\beta$  and also has oxidic phases (Supplementary Figure 1a). As we increased the exposure time  $t$ , the  $\alpha$  and  $\gamma$  peaks gradually became stronger while the  $\beta$  peak became weaker, which indicates that hydrogen is covalently bonded with carbon in graphene. The relative portion of both  $\alpha$  and  $\gamma$  peaks started to saturate over an exposure time of 800 s, corresponding to an  $\eta$  of 25%, at which the optical bandwidth was also maximally saturated (Supplementary Figure 1b). The saturation implies that hydrogen in excess did not react further with carbon when  $\eta$  reached 25%. The H-Gr should therefore be a stoichiometric form of  $C_4H$ .

## Supplementary Note 2

### Estimation of a higher-lying direct bandwidth in H-Gr by optical absorption.

The optical transmission  $T$  of graphene and H-Gr on a sapphire substrate was measured in the visible-ultraviolet (VUV) region by grating spectrophotometry (Supplementary Figure 2). With the transmission normalized against the substrate effect, the optical absorption coefficient  $\alpha$  was obtained according to the standard formula

$$\alpha = -\frac{1}{d} \ln T, \quad \text{Eq. 1}$$

where  $d$  is the thickness of the sample. In general, the absorption coefficient due to an interband transition of photo-excited electrons is described by

$$\alpha(\nu)h\nu = B(h\nu - E_g)^\beta, \quad \text{Eq. 2}$$

where  $B$  is a material-dependent constant,  $h\nu$  is the incident photon energy, and  $E_g$  is the threshold energy for interband absorption (often a band gap itself for a direct band-gap semiconductor). Our higher-lying absorption background is best fitted with  $\beta \approx 1/2$ , i.e., a direct interband transition type. The  $E_g$  for our H-Gr is determined by the energy-intercept of the line tangent to the high-energy (4-6 eV) absorption tail of  $\alpha^2 E^2$ .

### Supplementary Note 3

#### Temperature dependence of resistivity of pristine and hydrogenated graphene.

We search for gapped-semiconductor behavior from our  $\rho$ - $T$  data of three types of graphene films (pristine, H-Gr ( $\eta=12\%$ ), and H-Gr ( $\eta=25\%$ )) over the temperature range of 1.8-250 K. As shown in Supplementary Figure 3a, the resistivity ( $\rho$ ) of pristine graphene monotonically decreases with decreasing temperature, revealing its metallic transport characteristics, which include saturation behavior toward zero temperature. In sharp contrast, both H-Gr films exhibit insulator-like transport characteristics as their resistivity increases with decreasing temperature. While the resistivity of H-Gr ( $\eta=12\%$ ) can be fitted well with a single power-law exponent close to  $-1/3$ , suggesting variable-range hopping (VRH), over the entire temperature range of our measurement, H-Gr ( $\eta=25\%$ ) exhibits three distinct regions characterized by (1) an exponential dependence, consistent with the intrinsic region with a gap of 3.8 eV; (2) a power-law type ( $T^{-1/3}$ ), consistent with the VRH regime; and (3) saturation behavior, possibly headed toward the Mott minimum conductivity. If we force the gapped-model fit to the resistivity of H-Gr ( $\eta=12\%$ ) within a narrow interval of the high temperature region, we obtain a gap energy of 0.02 eV, which deviates substantially from the bandgap ( $\sim 2$  eV) of H-Gr ( $\eta=12\%$ ) estimated by synchrotron radiation spectroscopy or optical absorption experiments. This result means that H-Gr ( $\eta=12\%$ ), with a hydrogen concentration level lower than 25%, could actually have been driven to be a disordered state by random hydrogenation. In contrast, for H-Gr ( $\eta=25\%$ ,  $E_g \sim 3.9$  eV), the  $\rho$ - $T^{-1}$  fit in the high temperature region clearly shows evidence of an intrinsic band gap of  $\sim 3.8$  eV, which is quite consistent with that ( $\sim 3.9$  eV) obtained by synchrotron radiation spectroscopy or optical absorption experiments.



## Supplementary Note 4

### Carrier mobility and concentration of pristine and hydrogenated graphene.

In order to obtain FET mobility by 2-probe measurement, we applied constant source-drain voltage ( $V_{sd}$ ), and FET mobility ( $\mu$ ) was extracted from the differential curve of the electric field effect according to the standard formula

$$\mu = \frac{L}{W \cdot C_i \cdot V_{sd}} \left( \frac{\Delta I_{sd}}{\Delta V_{bg}} \right), \quad \text{Eq. 3}$$

where  $L$  ( $W$ ) is length (width) of graphene channel.  $C_i$  is the gate capacitance and it was  $3.0 \times 10^{-8}$  F/cm<sup>2</sup> in our 100-nm-thick SiO<sub>2</sub>.  $V_{bg}$  is the back gate bias voltage.  $I_{sd}$  is the source-drain current measured by the electric field effect measurement.

For 4-probe Hall measurement, constant  $I_{sd}$  of 100 nA was flowed, and Hall voltage ( $V_H$ ) was measured. The mobility and carrier concentration ( $n$ ) were calculated according to the standard equation of Hall measurement,

$$\mu = \frac{V_H \sigma}{I \cdot B} = -\frac{\sigma}{ne}, \quad \text{Eq. 4}$$

where  $B$  is the external magnetic field,  $\sigma$  the conductivity of graphene and  $e$  the elementary charge.

### Supplementary References

1. Li, Y. & Chen, Z. Patterned partially hydrogenated graphene (C<sub>4</sub>H) and its one-dimensional analogues: A computational study. *J. Phys. Chem. C* **116**, 4526-4534 (2012).
2. Ma, Y. *et al.* Electronic and magnetic properties of the two-dimensional C<sub>4</sub>H-type polymer with strain effects, intrinsic defects and foreign atom substitutions. *Phys. Chem. Chem. Phys.* **14**, 3651-3658 (2012).
